# Supplementary material for: Defining the Plasticity of Transcription Factor Binding Sites by Deconstructing DNA Consensus Sequences: The PhoP-Binding Sites among Gamma/Enterobacteria
Source: PLOS journal article supplement (doi:10.1371/journal.pcbi.1000862), 2010-07-22
Supplement: S6 (10.1371/journal.pcbi.1000862.s006) [file journal.pcbi.1000862.s006]

**Table S1: PhoP classifiers obtained by employing different clustering methods.**

|                     | Consensus |       | MEME  |       | AlignACE |       |
|---------------------|-----------|-------|-------|-------|----------|-------|
|                     | CC        | SCC   | CC    | SCC   | CC       | SCC   |
| <b>Single Motif</b> | 0.654     | 0.547 | 0.707 | 0.613 | 0.718    | 0.709 |
| <b>Subtractive</b>  | 0.823     | 0.730 | 0.832 | 0.773 | 0.778    | 0.762 |
| <b>Hierarchical</b> | 0.859     | 0.799 | 0.843 | 0.806 | 0.790    | 0.785 |

(\*) CC: Correlation Coefficient; SCC: Standardized Correlation Coefficient.
